# Supplementary material for: Stimuli-responsive liquid crystal physical gels based on the hierarchical superstructures of benzene-1,3,5-tricarboxamide macrogelators
Source: Royal Society of Chemistry journal article supplement (doi:10.1039/c7py00134g), 2017-01-01
Supplement: c7py00134g1.pdf [file c7py00134g1.pdf]

## Supplementary Information

### Stimuli-Responsive Liquid Crystal Physical Gels Based on the Hierarchical Superstructures of Benzene-1,3,5-Tricarboxamide Macrogelators

*Yu-Jin Choi,<sup>†</sup> Won-Jin Yoon,<sup>†</sup> Dae-Yoon Kim<sup>†</sup>, Minwook Park,<sup>†</sup> Yumin Lee,<sup>†</sup> Daseal Jung,<sup>†</sup>  
Jin-Soo Kim,<sup>‡</sup> Yeon-Tae Yu,<sup>‡</sup> Cheul-Ro Lee,<sup>‡</sup> and Kwang-Un Jeong<sup>†,\*</sup>*

<sup>†</sup>BK21 Plus Haptic Polymer Composite Research Team & Department of Polymer-Nano Science and Technology, and <sup>‡</sup>Division of Advanced Materials Engineering, Chonbuk National University, Jeonju 54896, Republic of Korea

Correspondence and requests for materials should be addressed to K.U.J. (E-mail: kujeong@jbnu.ac.kr)

#### Experimental method

**Materials:** Raney-Nickel catalyst (Ni,  $\geq 89\%$ , Al  $\geq 6\%$ , TCI), hydrazine monohydrate (98%, Sigma-Aldrich), 1-bromooctane (99%, TCI), 4-nitrophenol (99%, TCI), phenol (99%, TCI), 18-crown-6-ether (99%, TCI), trimethylamine (99%, Sigma-Aldrich), methyl *p*-toluenesulfonate (98%, TCI), methyl 3,4,5-trihydroxybenzoate (98%, TCI), *p*-phenylenediamine (99%, Sigma-Aldrich), N,N'-diisopropylcarbodiimide (99%, TCI), 4-(dimethylamino) pyridinium 4-toluene sulfonate (99%, TCI), benzene-1,3,5-tricarbonyl chloride (98%, TCI), pyridine (anhydrous, TCI), hydrochloric acid (37%, Showa), potassium carbonate (99.5%, Showa), and sodium nitrite (97%, Showa) were used without further purifications. The BTA3AZO molecules were synthesized according to the references (24, 40).

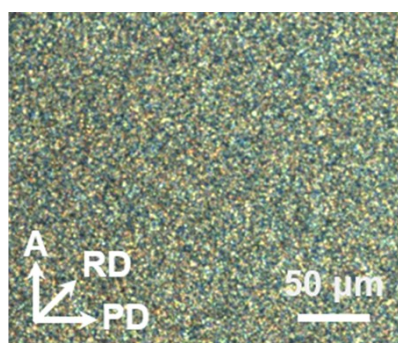

**Fig. S1** POM image of polyimide (PI) planar alignment cell filled with 1 wt% BTA3AZO LCPGs. POM is taken when the rubbing direction (RD) is 45°-tilted with respect to the polarization axis.

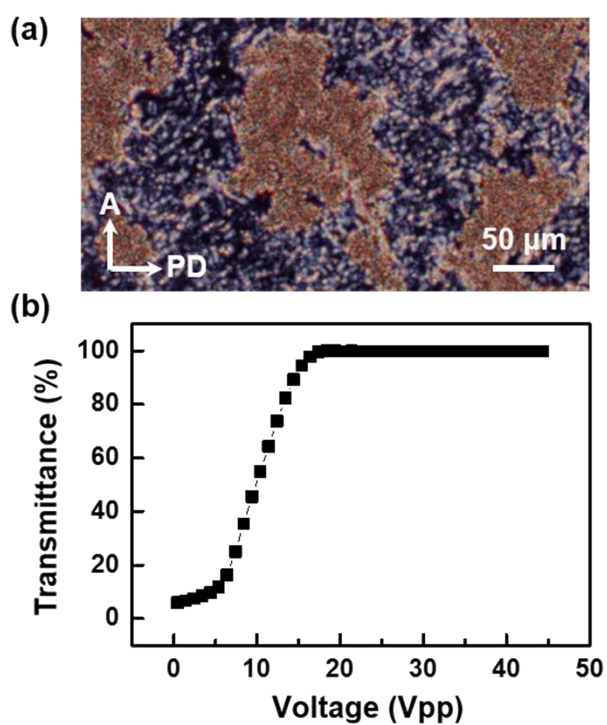

**Fig. S2** POM image of LC test cells filled with 1 wt% BTA3AZO LCPGs with vertical ALs, and their corresponding electro-optical response upon increasing the applied voltage.

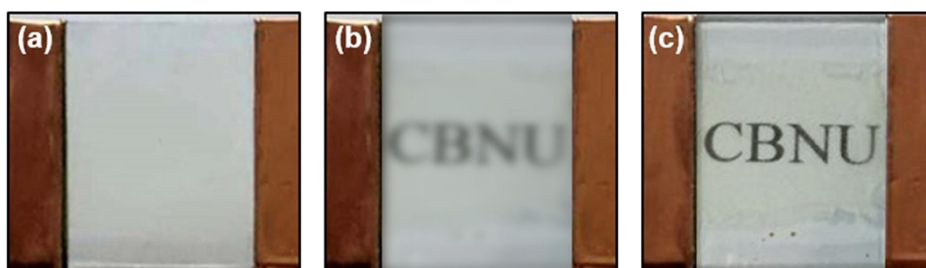

**Fig. S3** Macroscopic images of LC test cells filled with 1 wt% BTA3AZO LCPGs (a) without PI ALs as well as with (b) planar and (c) vertical ALs.
